# Supplementary material for: The Snow-Friction of Freestyle Skis and Snowboards Predicted From Snow Physical Quantities
Source: Frontiers journal article supplement (doi:10.3389/fmech.2021.728722), 2021-09-16
Supplement: Table_5.xlsx [file Table_5.xlsx]

## Sheet: Table 1
		SKI			SNB
	model	Scott Park 178			Burton Vapor 157
	lenght / running length (mm)	1780 / 1410			1570 / 1170
	width (tail / waist / tip) (mm)	114 / 78 / 103			294 / 250 / 294
	weight (incl. bindings) (g)	5684			4833
	mean peak-to-valley height Rz (µm)	20.26	±	2.32474	19.43	±	2.96177
	mean width of profile elements RSm (µm)	345.8	±	65.0796	333.3	±	68.2511
	profile skewness Rsk (µm)	-0.3083	±	0.249716	-0.4503	±	0.174643
	advancing angle unwaxed (°)	92	±	2.4	79.3	±	3.5
	receding angle unwaxed (°)	56.3	±	5.5	45	±	6.9
	advancing angle waxed (°)	98.1	±	2.5	104.8	±	4.6
	receding angle waxed (°)	72.4	±	3.2	75.1	±	3.8
	Table 1: Properties of the test skis and snowboard including surface roughness parameters (n = 10) and dynamic contact angles of distilled water (n = 8). The advancing (receding) angle is the contact angle which occurs in the course of wetting (de-wetting) of the ski base.

## Sheet: Table 2
	date	weather	Tair (°C)			RH (%)			wind (m s-1)			SWR (W m-2)			track	athlete	runs analysed / captured
	2017-03-30	sunny	3.33061	±	0.315637	32.2237	±	2.81837	-0.332171	±	0.574716	832.345	±	72.1527	WFJ	s2	15 / 15
	2017-03-31	sunny	1.97156	±	0.414179	48.4558	±	1.49178	-1.2458	±	0.600321	829.128	±	99.4699	WFJ	s7	9 / 11
	2018-02-01	strong snowfall	-7.73236	±	1.01867	98	±	1.09545	1.19857	±	2.07204	214	±	12.4676	WFJ	s2	5 / 5
	2018-02-07	partly sunny, fog	-8.05957	±	2.57217	83.4545	±	27.2609	-0.248061	±	0.583455	296.386	±	125.029	WFJ	s1	10 / 10
	2018-02-08	fog, slight snowfall	-11.1927	±	0.560201	96.75	±	1.63936	-0.559407	±	0.474895	480.694	±	97.8467	WFJ	s5	8 / 9
	2018-02-13	sunny	-15.9983	±	0.777799	54.9	±	12.6764	0.0586162	±	0.670898	599.667	±	56.6605	WFJ	s2	10 / 11
	2018-02-21	partly sunny, slight snowfall	-12.8832	±	0.354038	77	±	4.47214	-0.319873	±	0.704086	435.37	±	117.39	WFJ	s1, s5	6 / 6
	2018-02-22	cloudy to sunny	-10.0428	±	0.3952	77.25	±	8.10478	-1.53343	±	1.22194	643.137	±	257.206	WFJ	s1, s5	12 / 13
	2018-03-03	cloudy to sunny	-5.1763	±	0.425363	67.9565	±	15.1097	-1.34719	±	1.38268	478.068	±	186.482	WFJ	s1, s7	23 / 24
	2018-03-04	sunny	-4.67052	±	0.549506	45.125	±	5.68853	-2.21314	±	1.12552	680.648	±	83.193	WFJ	s4, s5	24 / 29
	2018-03-28	cloudy to sunny	7.53333	±	2.03425	57.345	±	8.45461	0.528006	±	0.253516	583.793	±	210.374	BOL	s4, s6	30 / 37
	2018-04-06	sunny	8.94348	±	3.86709	25.046	±	6.7722	1.1253	±	0.455001	697.285	±	111.815	BOL	s2, s7	23 / 29
	2018-04-08	sunny	9.78462	±	3.05231	51.7232	±	22.1391	1.55187	±	0.597708	692.219	±	154.567	BOL	s1, s7	39 / 40
	Table 2: Weather description and average (mean ± σ) weather parameters during the captured runs of each test day (date).

## Sheet: Table 3
	date	snow description	grain shape and grain size (mm)	days since last snowfall (HN24, HN72)	TLWCmin (°C)	TLWCmax (°C; vol.%)	ρs (kg m-3)			SSA (mm-1)			PR (N)
	2017-03-30	spring snow	MFcl (MFpc), 1	8 (8, 8 cm)	-0.5	6	450.667	±	24.9466	5.96195	±	0.122208	81.9192	±	44.7584
	2017-03-31	spring snow	MFpc (MFcl), 1.5	9 (8, 8 cm)	-1.5	5.1	474	±	34.0441	7.59575	±	0.0961564	146.043	±	101.633
	2018-02-01	new snow dry	DF (PPsd) rimed, 0.25-2	5 (2, 2 cm)	-7.5	-7	158.833	±	40.6847	82.1429	±	6.1859	94.9982	±	28.5595
	2018-02-07	winter snow warm	RG, 0.25	3 (1, 18 cm)	-7.2	-2.8	430.067	±	35.7161	10.7737	±	3.16737	136.286	±	29.6341
	2018-02-08	winter snow mid/new snow dry	RG (DF), 0.5-1	0 (1, 1 cm)	-9.7	-8.2	291.8	±	44.6817	60.8978	±	13.8964	103.738	±	19.5336
	2018-02-13	winter snow cold	RG (FC), 0.25-0.5	0 (3, 19 cm)	-17.8	-13	279.75	±	26.53	36.93	±	18.7088	104.438	±	16.5755
	2018-02-21	winter snow mid	FC (RG), 0.5	0 (4, 4 cm)	-13.4	-8.3	332.15	±	52.8536	39.6044	±	9.39147	66.5331	±	16.1599
	2018-02-22	winter snow mid/cold	FC (RG), 0.5	1 (0, 4 cm)	-14.3	-6.9	429.333	±	25.0951	17.0882	±	3.45892	113.276	±	34.1523
	2018-03-03	winter snow warm	DF (RG), 0.5	0 (7, 10 cm)	-6.6	-4.8	348.857	±	27.2586	44.1236	±	15.7039	91.4947	±	27.556
	2018-03-04	winter snow mid/warm	RG (FC), 0.25-0.5	0 (4, 14 cm)	-10.2	-4.4	339.25	±	24.681	30.9038	±	9.55543	132.078	±	47.2899
	2018-03-28	new snow dry/wet	MF (DF), 0.5	0 (9, 12 cm)	-0.4	10.2	451.333	±	31.0859	38.3317	±	9.14923	104.013	±	27.6567
	2018-04-06	spring snow	MFpc, 0.75-3	4 (1, 11 cm)	-7.5	5.7	503	±	19.2873	4.82342	±	0.279157	142.151	±	118.089
	2018-04-08	spring snow	MFpc, 1-4	6 (1, 11 cm)	-2.3	11.9	412	±	12.2882	2.5	±	0	135.581	±	114.983
	Table 3: Snow conditions on each test day: Colloquially described, classified after Fierz et al. (2009), and quantified by the daily range (TLWC) or mean (± σ) of the measured snow physical properties. HN24 (HN72) describes the height of fallen new snow during the past 24 (72) hours.

## Sheet: Table 4
	measured input quantitiy	uncertainty		deduced input quantitiy	uncertainty
		value	comment		value	comment
	postion	± 0.02 m	dGNSS accuracy	radius (κ-1)	± 0.04 m	propagated from velocity & position uncertainty
				velocity	± 0.08 m s-1	RMSE smoothed vs. raw signal
				acceleration	± 0.09 m s-2
				slope	± 0.22°	propagated from velocity uncertainty
	mass	± 1 kg	assumption
	drag area	± 0.027 m2	assumed as 5% of drag / lift area
	lift area	± 0.011 m2
	wind velocity	± 0.2 m s-1	RMSE smoothed vs. raw signal	relative air velocity	0.28 m s-1	sum of wind & athlete velocity uncertainty
	atmospheric pressure	± 105 hPa	probable diurnal variation	air density	0.05 kg m-3	propagated from variation of Tair and patm
	air temperature	± 5°C
	relative humidity	± 0 %	neglectable
	Table 4: Values and explanations of the assumed uncertainties of the measured and deduced input quantities.

## Sheet: Table 5
	sport	snow description		COFoverall			COFstart	COFmin	COF10	COF15	COFvmax	vcofmin	vmax	n	TLWC (°C; vol.%)	date
	SKI	spring snow	dry	0.0261907	±	0.00399781	0.0636515	0.0162271	0.0246618	0.0234552	0.0719669	8.01097	18.4497	4	-2…0°C	2018-04-08
				0.0281677	±	0.00391738	0.0695791	0.0188005	0.0273321	0.0250783	0.048051	7.50454	17.1727	6	-2…0°C	2018-04-06
				0.0368099	±	0.000663342	0.104546	0.035648	0.0366351	0.0378517	0.0349149	8.12757	22.8699	2	-1...0°C	2017-03-30
			wet	0.0431189	±	0.00296299	0.0926058	0.0381392	0.0415957	0.0484973	0.0510203	7.58938	22.0354	4	5...6%	2017-03-30
				0.044416	±	0.00487103	0.0701858	0.0315011	0.0453578	0.0427001	0.0763104	7.43739	16.5657	3	5...8%	2018-04-08
				0.0536153	±	0.00604241	0.0678612	0.0356635	0.0531192	0.0581612	0.0728777	6.5305	15.8845	3	5...7%	2018-04-06
			very wet	0.0815292	±	0.00648494	0.102541	0.0685084	0.0821949	0.0980695	0.0980695	6.41136	14.0268	4	9...12%	2018-04-08
		winter snow	warm	0.0481539	±	0.00191538	0.113591	0.045707	0.0463709	0.0514484	0.068921	11.1429	21.3616	5	-3...-6°C	2018-02-07
				0.058962	±	0.00276059	0.088203	0.0533142	0.0590031	0.0670735	0.0720565	6.19392	18.0163	5	-5…-4°C	2018-03-04
				0.0588009	±	0.00346112	0.11378	0.0542748	0.0543143	0.0651426	0.0843653	9.78152	19.7447	3	-6...-4°C	2018-03-03
			mid	0.0416113	±	0.00125907	0.100355	0.0396728	0.0397479	0.0437712	0.0628382	10.512	20.66	2	-7…-8°C	2018-02-22
				0.0454481	±	0.0011397	0.107602	0.0438322	0.0452675	0.0473747	0.0638736	11.3803	21.3076	3	-8…-10°C	2018-02-21
			cold	0.0517575	±	0.000822239	0.113015	0.0503621	0.0510364	0.0522376	0.0716877	11.044	21.6435	3	-14°C	2018-02-22
				0.0585402	±	0.00102577	0.113766	0.0571124	0.0586744	0.0604322	0.0730575	11.92	20.209	5	-15...-18°C	2018-02-13
		new snow	dry	0.0603321	±	0.00759093	0.0894056	0.0390655	0.0556288	0.0714789	0.0714789	6.9306	13.7251	5	-1…0°C	2018-03-28
			dry (snowfall)	0.0793736	±	0.00721547	0.108036	0.0707318	0.0746686	0.0961346	0.118293	7.09813	19.0973	3	-7°C	2018-02-01
			wet	0.08695	±	0.0103293	0.0882109	0.0663273	0.0783608	0.104007	0.104007	7.71052	11.8436	3	3...4%	2018-03-28
			very wet	0.137543	±	0.0153587	0.114624	0.101615	0.133445	0.133445	0.133445	5.12152	8.35448	1	8…9%	2018-03-28
	SNB	spring snow	dry	0.0306521	±	0.00430365	0.0712154	0.0187541	0.027217	0.0334759	0.065441	8.09107	18.0768	3	-2…0°C	2018-04-08
				0.0331197	±	0.00246314	0.093054	0.0287705	0.0295298	0.0368168	0.0973	9.02531	20.0242	2	-2…0°C	2017-01-31
				0.0337441	±	0.00133321	0.137098	0.0301186	0.0308533	0.0358133	0.0741729	9.5133	16.4386	2	-2…0°C	2018-04-06
			wet	0.0491448	±	0.00306951	0.0693318	0.0394303	0.050527	0.0517444	0.0742954	7.06093	16.7649	3	7...8%	2018-04-08
				0.0610198	±	0.00660725	0.171204	0.042657	0.0581828	0.0612323	0.0781351	7.41273	15.7942	3	5...6%	2018-04-06
				0.0609671	±	0.00858549	0.119717	0.0461218	0.0540776	0.0753708	0.0872608	7.76136	18.7627	3	4...6%	2017-03-31
			very wet	0.0715733	±	0.00365584	0.0898308	0.0610599	0.0748776	0.0732867	0.0763008	6.5328	15.0766	5	9...10%	2018-04-08
		winter snow	warm	0.0491501	±	0.00341173	0.0997315	0.043282	0.0472886	0.0549039	0.0652892	7.26799	21.3561	4	-4…-5°C	2018-03-04
				0.0518095	±	0.00237958	0.108777	0.047894	0.050039	0.0554262	0.065555	7.96495	20.7735	5	-6…-4°C	2018-03-03
			mid	0.0508167	±	0.00154337	0.103985	0.0478619	0.0503341	0.0538023	0.067452	7.37904	21.9133	3	-8°C	2018-02-22
				0.0584637	±	0.00479683	0.102617	0.0518139	0.0554242	0.0670804	0.0755782	6.92584	22.2698	2	-11...-12°C	2018-02-21
		new snow	dry (snowfall)	0.0585976	±	0.00109379	0.121044	0.0572162	0.0596761	0.0583418	0.0626193	8.203	21.7814	2	-10…-8°C	2018-02-08
			dry	0.0732174	±	0.00987469	0.105329	0.0451955	0.0661713	0.0871793	0.0871793	6.9267	13.8808	5	-1…0°C	2018-03-28
			wet	0.0974391	±	0.0136965	0.0947019	0.0609297	0.100355	0.12036	0.12036	6.35175	11.8234	4	3...4%	2018-03-28
				0.109694	±	0.0110187	0.101193	0.0762521	0.103677	0.108636	0.108636	6.09663	11.3808	3	5...8%	2018-03-28
			very wet	0.136066	±	0.014099	0.106115	0.0980659	0.139801	0.139801	0.139801	4.47801	8.69655	2	9...10%	2018-03-28
	Table 5: Friction coefficients averaged over 2 to 6 consecutive runs with constant snow conditions, categorized into spring, winter and new snow with different snow temperature or snow wetness sub-categories. The overall COFs (mean ± σ) were averaged from 5 to 15 m s-1. Instantaneous COF values at the start (after 4 m of gliding; COFstart), when reaching the minimum COF (COFmin), at 10 m s-1 (COF…

## Sheet: Table A1
		parameter	coefficient (-)	standard error (-)	relative standard error (%)
	SKI	Intercept	0.029544	0.0026032	8.81126
		PR	-1.4194e-05	6.8569e-06	48.3084
		SSA	0.0011825	8.0408e-05	6.79983
		TLWC	0.0016302	0.0004228	25.9355
		PR · TLWC	-8.8124e-06	3.4797e-06	39.4864
		SSA · TLWC	9.2138e-05	1.0258e-05	11.1333
		TLWC2	0.00022151	2.4047e-05	10.8559
	SNB	Intercept	0.048343	0.0064943	13.4338
		PR	-0.00011548	5.2416e-05	45.3897
		SSA	0.00068578	0.00018788	27.3965
		TLWC	8.0166e-05	3.5019e-05	43.6831
		PR · SSA	3.1883e-06	1.7425e-06	54.6529
		SSA · TLWC	0.00011752	1.1228e-05	9.55412
		PR2	1.2171e-07	7.0206e-08	57.683
		TLWC2	0.00019726	3.5313e-05	17.9018
	Table A1: Coefficients and their standard errors of the multivariate models.
